# Supplementary material for: Tgfβ signaling is critical for maintenance of the tendon cell fate
Source: eLife journal article supplement (doi:10.7554/elife.52695), 2020-01-21

## Figure 2-figure supplement 1

### A Apoptosis detection assay – TUNEL

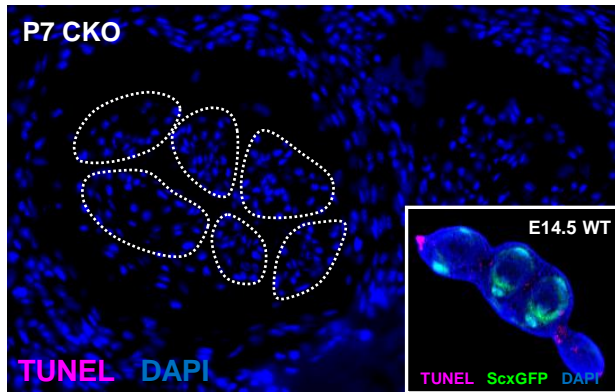

### B Proliferation detection assay – EdU

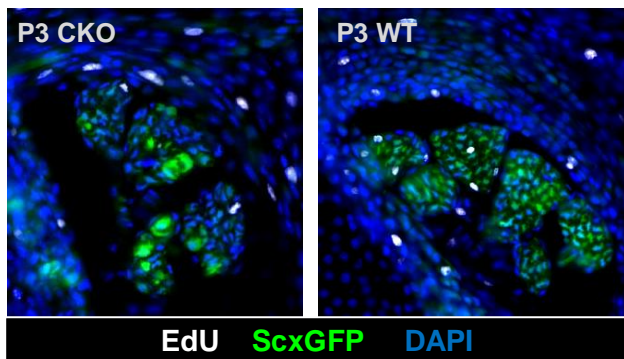

### C Staining for detection of transdifferentiation

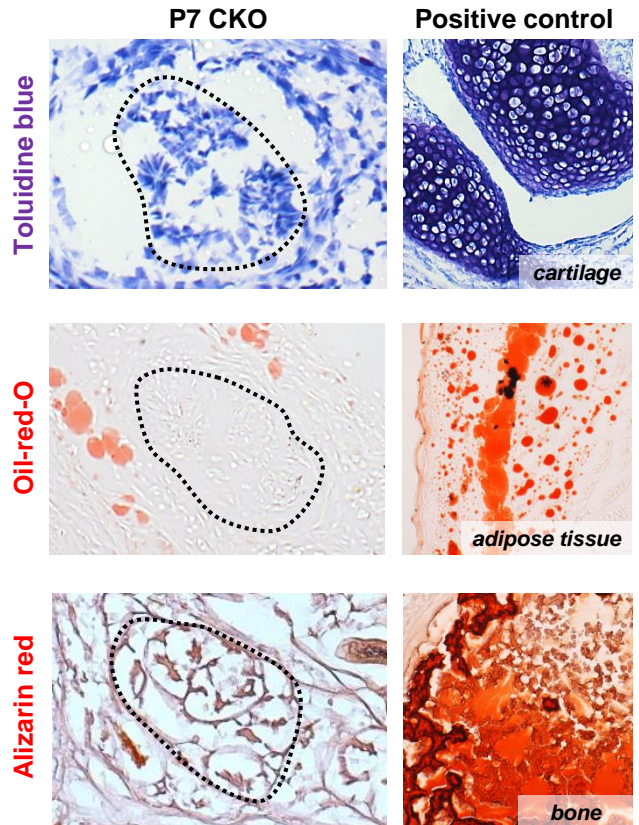

Supplement: supp [file elife_poa_e52695_Figure_2_figure_supplement_1.pdf › elife_poa_e52695_Figure_2_figure_supplement_1.pdf]
