# Supplementary material for: Tgfβ signaling is critical for maintenance of the tendon cell fate
Source: eLife. 2020 Jan 21;9:e52695. doi: 10.7554/eLife.52695 (PMC7025861; doi:10.7554/eLife.52695)
Supplement: Supplementary file 2. — Note that the expression level detected for Scx also included that of ScxGFP, and therefore do not reflect the expression level of endogenous Scx. [file elife-52695-supp2.xlsx]

## Sheet: Upregulated genes in mutant
gene_name	WikiGene.description	Fold change (Increment compared with P7 WT tenocytes)	Adjusted p-value
Dlk1	delta-like 1 homolog (Drosophila)	137.945	5.48225e-78
Serpine2	serine (or cysteine) peptidase inhibitor, clade E, member 2	118.212	1.18186e-52
Dpt	dermatopontin	95.7392	1.07437e-66
Ly6a	lymphocyte antigen 6 complex, locus A	54.2521	2.37435e-58
H19		51.0792	1.87347e-64
Cd34	CD34 antigen	47.8248	9.10904e-57
Lum	lumican	36.6437	3.65179e-57
Lgmn	legumain	31.8078	2.45233e-42
Cxcl12	chemokine (C-X-C motif) ligand 12	26.1223	7.003e-47
Mfap5	microfibrillar associated protein 5	22.5044	3.14693e-39
Ly6c1	lymphocyte antigen 6 complex, locus C1	21.6711	1.19821e-37
Igf2	insulin-like growth factor 2	21.4212	1.5246e-42
Serping1	serine (or cysteine) peptidase inhibitor, clade G, member 1	19.1603	2.33358e-40
Mgst1	microsomal glutathione S-transferase 1	18.2501	1.47902e-36
Aspn	asporin	15.9029	8.56864e-34
Mt1	metallothionein 1	15.4207	3.25891e-31
Mgst3	microsomal glutathione S-transferase 3	13.1436	7.35126e-31
Col3a1	collagen, type III, alpha 1	13.0026	1.71364e-35
Postn	periostin, osteoblast specific factor	12.9979	2.84996e-33
Itm2a	integral membrane protein 2A	12.685	1.70159e-34
Ptn	pleiotrophin	10.2813	1.96139e-30
Rps18-ps3		9.74301	2.2234e-28
Gsn	gelsolin	8.30608	1.37333e-24
Ifitm3	interferon induced transmembrane protein 3	8.18358	6.76626e-26
Col5a1	collagen, type V, alpha 1	8.1477	9.06859e-23
Clec3b	C-type lectin domain family 3, member b	8.13703	1.03908e-23
Cmtm3	CKLF-like MARVEL transmembrane domain containing 3	7.39942	8.6452e-22
Rpl9-ps6		6.97883	1.99831e-21
Mgp	matrix Gla protein	6.88916	5.4526e-21
Rpl23a-ps3		6.56665	7.59418e-21
Igf1	insulin-like growth factor 1	5.78839	2.44758e-18
Nbl1	neuroblastoma, suppression of tumorigenicity 1	5.49314	3.75596e-16
Plpp3	phospholipid phosphatase 3	5.08499	6.85543e-16
Sepp1	NA	5.07628	1.48232e-15
Apod	apolipoprotein D	5.05135	4.84608e-15
Fth1	ferritin heavy polypeptide 1	4.89379	3.59003e-16
Cdkn1c	cyclin-dependent kinase inhibitor 1C (P57)	4.80872	4.1536e-15
Sfrp2	secreted frizzled-related protein 2	4.2496	2.05046e-10
Mest	mesoderm specific transcript	4.11616	2.36411e-12
Junb	jun B proto-oncogene	4.08948	1.52258e-12
Igfbp3	insulin-like growth factor binding protein 3	4.07711	1.45636e-11
Apoe	apolipoprotein E	4.01199	1.20493e-09
Id3	inhibitor of DNA binding 3	3.72834	4.91954e-11
Igfbp5	insulin-like growth factor binding protein 5	3.65539	2.22185e-09
Mmp2	matrix metallopeptidase 2	3.64921	6.90369e-11
Fstl1	follistatin-like 1	3.53713	1.26491e-10
Rps27rt	ribosomal protein S27, retrogene	3.52306	7.36691e-11
Ctsb	cathepsin B	3.51198	1.68958e-10
Eif3e	eukaryotic translation initiation factor 3, subunit E	3.46567	4.30837e-10
Dnaja1	DnaJ heat shock protein family (Hsp40) member A1	3.46452	7.02958e-10
Anxa1	annexin A1	3.37339	4.13037e-09
Igfbp4	insulin-like growth factor binding protein 4	3.15109	6.12591e-09
Ndn	necdin	3.03441	4.92414e-08
C1qtnf2	C1q and tumor necrosis factor related protein 2	3.03371	5.11017e-08
Cirbp	cold inducible RNA binding protein	2.97452	5.61546e-08
Cyb5a	cytochrome b5 type A (microsomal)	2.94954	9.48552e-08
Eif3f	eukaryotic translation initiation factor 3, subunit F	2.90632	5.21312e-08
Cxcl14	chemokine (C-X-C motif) ligand 14	2.83936	1.51291e-06
Vim	vimentin	2.72816	3.09461e-07
Rnase4	ribonuclease, RNase A family 4	2.68997	8.69853e-07
Fos	FBJ osteosarcoma oncogene	2.66448	7.85047e-07
Arpc1b	actin related protein 2/3 complex, subunit 1B	2.6113	1.20071e-06
Efemp2	epidermal growth factor-containing fibulin-like extracellular matrix protein 2	2.58834	3.45192e-06
Tubb5	tubulin, beta 5 class I	2.56363	2.09564e-06
Cox7a2l	cytochrome c oxidase subunit VIIa polypeptide 2-like	2.44485	9.13467e-06
Rpl22l1	ribosomal protein L22 like 1	2.43927	1.76595e-05
Mmp14	matrix metallopeptidase 14 (membrane-inserted)	2.41754	1.27886e-05
Maged2	melanoma antigen, family D, 2	2.3826	2.2329e-05
Rpl39	ribosomal protein L39	2.37916	1.80086e-05
Rpl36a	ribosomal protein L36A	2.3512	1.51204e-05
Col5a2	collagen, type V, alpha 2	2.34107	2.70564e-05
Olfml3	olfactomedin-like 3	2.32692	4.69461e-05
Rps27	ribosomal protein S27	2.32471	1.88464e-05
S100a16	S100 calcium binding protein A16	2.31142	3.81001e-05
Emp1	epithelial membrane protein 1	2.27945	7.16319e-05
Ifitm2	interferon induced transmembrane protein 2	2.24298	4.91162e-05
Dbi	diazepam binding inhibitor	2.21701	0.000118648
Naca	nascent polypeptide-associated complex alpha polypeptide	2.17891	0.000102998
Rps18	ribosomal protein S18	2.11204	0.000187121
Rps4x	ribosomal protein S4, X-linked	2.10385	0.000204932
Rpl3	ribosomal protein L3	2.07547	0.000282183
Tuba1b	tubulin, alpha 1B	2.04474	0.000606341
Cnbp	cellular nucleic acid binding protein	2.03814	0.000527352
Rps19	ribosomal protein S19	2.03148	0.000437693
Dusp1	dual specificity phosphatase 1	2.02602	0.00103963
Map1lc3b	microtubule-associated protein 1 light chain 3 beta	2.019	0.000700695
Eif3h	eukaryotic translation initiation factor 3, subunit H	2.01454	0.000646828
Sh3bgrl3	SH3 domain binding glutamic acid-rich protein-like 3	2.00715	0.000865058
Rps5	ribosomal protein S5	2.00097	0.000607529

## Sheet: Downregulated genes in mutant
gene_name	WikiGene.description	Fold change (Decrement compared with P7 WT tenocytes)	Adjusted p-value
Wif1	Wnt inhibitory factor 1	157.395	1.14846e-83
Col11a2	collagen, type XI, alpha 2	92.0311	1.14329e-84
Scx	scleraxis	66.2491	5.2241e-85
Col2a1	collagen, type II, alpha 1	58.8737	2.09386e-70
Car9	carbonic anhydrase 9	58.0749	7.14371e-57
Sema3b	sema domain, immunoglobulin domain (Ig), short basic domain, secreted, (semaphorin) 3B	43.9013	5.79144e-60
Cgref1	cell growth regulator with EF hand domain 1	33.1864	6.5917e-57
Fmod	fibromodulin	27.9093	1.58417e-60
Cilp2	cartilage intermediate layer protein 2	24.7431	2.44653e-49
Matn4	matrilin 4	19.2937	4.41569e-39
P4ha1	procollagen-proline, 2-oxoglutarate 4-dioxygenase (proline 4-hydroxylase), alpha 1 polypeptide	13.4731	6.87765e-39
Pcolce2	procollagen C-endopeptidase enhancer 2	11.7948	7.62683e-33
Tpm1	tropomyosin 1, alpha	9.95597	1.00173e-31
Wisp1	WNT1 inducible signaling pathway protein 1	9.68827	8.28467e-29
Tnmd	tenomodulin	8.47732	1.26685e-29
Loxl2	lysyl oxidase-like 2	8.33913	1.07893e-26
1500015O10Rik	RIKEN cDNA 1500015O10 gene	7.13958	5.92288e-26
Col11a1	collagen, type XI, alpha 1	7.10081	1.05443e-24
Pdgfrl	platelet-derived growth factor receptor-like	6.95805	1.05443e-24
Mfap4	microfibrillar-associated protein 4	6.50957	4.18627e-23
Col1a1	collagen, type I, alpha 1	6.40828	1.36299e-23
Ptgis	prostaglandin I2 (prostacyclin) synthase	6.38785	4.64916e-22
Col1a2	collagen, type I, alpha 2	6.16983	7.63071e-23
Itgbl1	integrin, beta-like 1	5.71899	7.884e-19
Tpm2	tropomyosin 2, beta	5.36493	7.22423e-17
C1qtnf3	C1q and tumor necrosis factor related protein 3	5.35736	1.27569e-17
Col12a1	collagen, type XII, alpha 1	5.21331	3.11066e-18
Ndufa4l2	NADH dehydrogenase (ubiquinone) 1 alpha subcomplex, 4-like 2	5.12382	3.49454e-16
Sparc	secreted acidic cysteine rich glycoprotein	5.03977	1.42737e-18
Fam46a	family with sequence similarity 46, member A	4.9203	1.8922e-16
Fam3c	family with sequence similarity 3, member C	4.81578	8.71383e-16
Lox	lysyl oxidase	4.72679	1.80515e-15
Gm42418		4.70639	8.03398e-14
Cpxm2	carboxypeptidase X 2 (M14 family)	4.70529	3.8317e-16
Abi3bp	ABI gene family, member 3 (NESH) binding protein	4.5893	8.6831e-16
Creb3l1	cAMP responsive element binding protein 3-like 1	4.4852	4.5937e-15
Ckb	creatine kinase, brain	4.43817	4.57983e-15
Col16a1	collagen, type XVI, alpha 1	4.37816	2.73367e-14
Cpz	carboxypeptidase Z	4.32496	1.71217e-14
Higd1a	HIG1 domain family, member 1A	4.2193	1.10499e-13
Ssc5d	scavenger receptor cysteine rich family, 5 domains	3.32726	4.94837e-10
Fkbp11	FK506 binding protein 11	3.28672	4.99455e-10
Thbs2	thrombospondin 2	3.2221	1.27131e-09
Ift20	intraflagellar transport 20	3.12031	1.40894e-09
Sec61b	Sec61 beta subunit	3.08267	1.56679e-09
Comp	cartilage oligomeric matrix protein	3.04096	1.37111e-08
Fkbp9	FK506 binding protein 9	3.00805	4.72467e-09
Rcn3	reticulocalbin 3, EF-hand calcium binding domain	2.99452	4.11255e-09
Thy1	thymus cell antigen 1, theta	2.95373	3.02568e-08
Mmp23	matrix metallopeptidase 23	2.91698	4.25412e-08
Htra1	HtrA serine peptidase 1	2.82828	5.13453e-08
Itm2c	integral membrane protein 2C	2.73903	1.19331e-07
Hdlbp	high density lipoprotein (HDL) binding protein	2.736	2.54521e-07
Lman1	lectin, mannose-binding, 1	2.72036	3.3778e-07
Srm	spermidine synthase	2.67105	4.49751e-07
Kdelr2	KDEL (Lys-Asp-Glu-Leu) endoplasmic reticulum protein retention receptor 2	2.63458	4.49751e-07
Thbs4	thrombospondin 4	2.63272	6.31689e-07
Ssr4	signal sequence receptor, delta	2.62591	3.20646e-07
Ndufa1	NADH dehydrogenase (ubiquinone) 1 alpha subcomplex, 1	2.62098	5.81165e-07
Sdc1	syndecan 1	2.57853	1.61601e-06
Crtap	cartilage associated protein	2.5638	1.0542e-06
P3h4	prolyl 3-hydroxylase family member 4 (non-enzymatic)	2.54577	1.81155e-06
Surf4	surfeit gene 4	2.53449	1.91853e-06
Nme1	NME/NM23 nucleoside diphosphate kinase 1	2.50555	2.11283e-06
Cryab	crystallin, alpha B	2.50507	3.36382e-06
Rrbp1	ribosome binding protein 1	2.4987	1.61362e-06
Nupr1	nuclear protein transcription regulator 1	2.48885	3.04623e-06
Clec11a	C-type lectin domain family 11, member a	2.46932	3.07849e-06
Vkorc1	vitamin K epoxide reductase complex, subunit 1	2.44308	3.02404e-06
Col6a2	collagen, type VI, alpha 2	2.43331	3.54403e-06
Fxyd6	FXYD domain-containing ion transport regulator 6	2.42225	4.95902e-06
Copz2	coatomer protein complex, subunit zeta 2	2.35166	8.17953e-06
Ckap4	cytoskeleton-associated protein 4	2.3346	1.4579e-05
Plpp1	phospholipid phosphatase 1	2.31465	1.70258e-05
Fkbp10	FK506 binding protein 10	2.31296	1.79384e-05
Atp5e	ATP synthase, H+ transporting, mitochondrial F1 complex, epsilon subunit	2.30063	1.41193e-05
Yif1b	Yip1 interacting factor homolog B (S. cerevisiae)	2.29812	2.74432e-05
Col6a3	collagen, type VI, alpha 3	2.27911	2.10028e-05
Ost4	oligosaccharyltransferase complex subunit 4 (non-catalytic)	2.27578	2.05376e-05
Col6a1	collagen, type VI, alpha 1	2.26352	2.2852e-05
Sec13	SEC13 homolog, nuclear pore and COPII coat complex component	2.25364	4.14814e-05
Mtch1	mitochondrial carrier 1	2.25347	3.75083e-05
Rabac1	Rab acceptor 1 (prenylated)	2.23685	3.02027e-05
Ndufb10	NADH dehydrogenase (ubiquinone) 1 beta subcomplex, 10	2.23415	3.67207e-05
Smdt1	single-pass membrane protein with aspartate rich tail 1	2.2256	4.14124e-05
Snhg18		2.21688	4.54804e-05
2310039H08Rik	RIKEN cDNA 2310039H08 gene	2.19686	8.81375e-05
Fndc1	fibronectin type III domain containing 1	2.17234	0.000101821
Igfbp6	insulin-like growth factor binding protein 6	2.13272	0.000272532
Tmem258	transmembrane protein 258	2.13082	0.000126214
Tgfbi	transforming growth factor, beta induced	2.08918	0.000245652
C1qtnf6	C1q and tumor necrosis factor related protein 6	2.08248	0.000228595
Serpinh1	serine (or cysteine) peptidase inhibitor, clade H, member 1	2.04418	0.000241281
P3h3	prolyl 3-hydroxylase 3	2.02522	0.000546097
Kdelr3	KDEL (Lys-Asp-Glu-Leu) endoplasmic reticulum protein retention receptor 3	2.02429	0.000394034
Pkm	pyruvate kinase, muscle	2.02319	0.000466358
Angptl2	angiopoietin-like 2	2.02052	0.000441838
