# Supplementary figures and images for: Tgfβ signaling is critical for maintenance of the tendon cell fate
Source: eLife journal article supplement (doi:10.7554/elife.52695), 2020-01-21

Figure 1-figure supplement 1

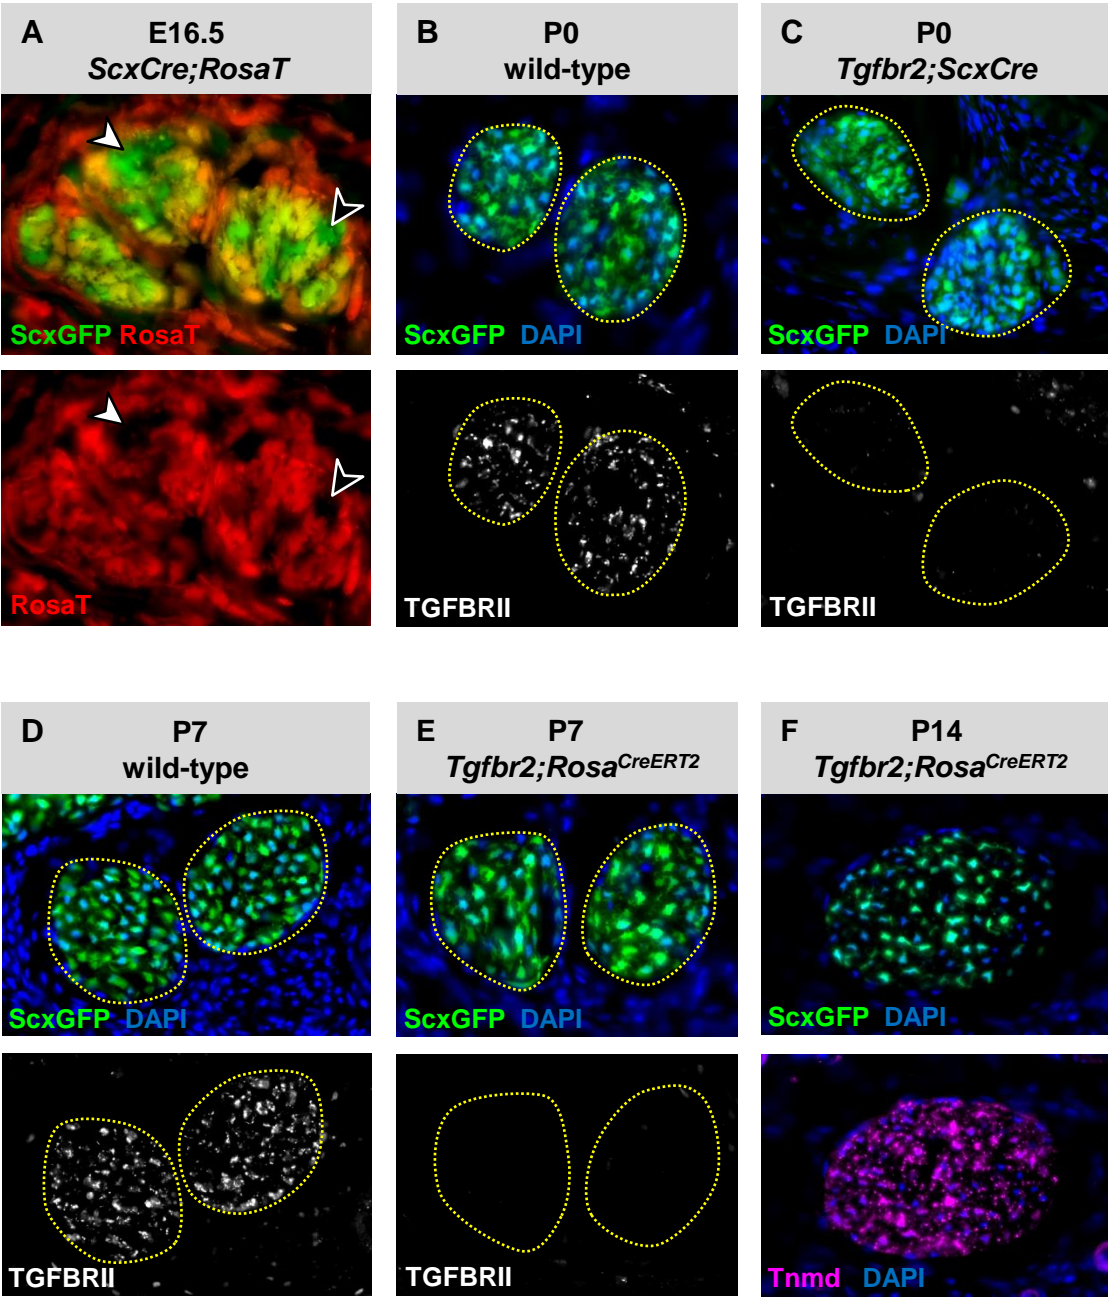

Supplement: supp [file elife_poa_e52695_Figure_1_figure_supplement_1.pdf › elife_poa_e52695_Figure_1_figure_supplement_1.pdf]

Figure 1-figure supplement 2

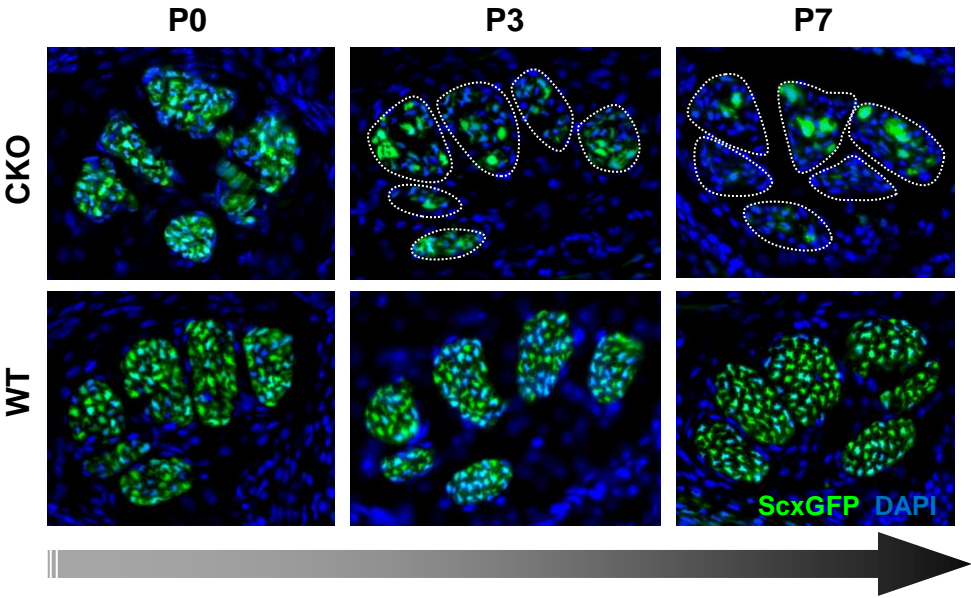

Supplement: supp [file elife_poa_e52695_Figure_1_figure_supplement_2.pdf › elife_poa_e52695_Figure_1_figure_supplement_2.pdf]

Figure 1-figure supplement 3

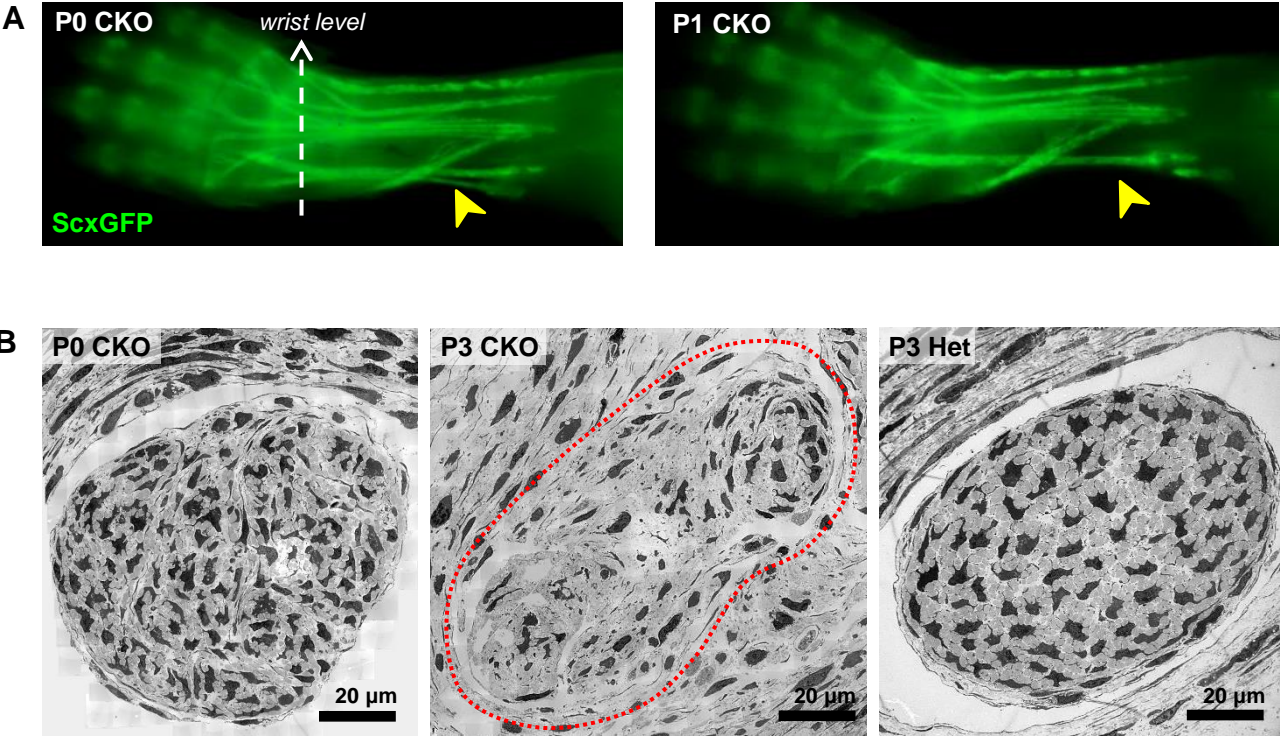

Supplement: supp [file elife_poa_e52695_Figure_1_figure_supplement_3.pdf › elife_poa_e52695_Figure_1_figure_supplement_3.pdf]

Figure 1-figure supplement 4

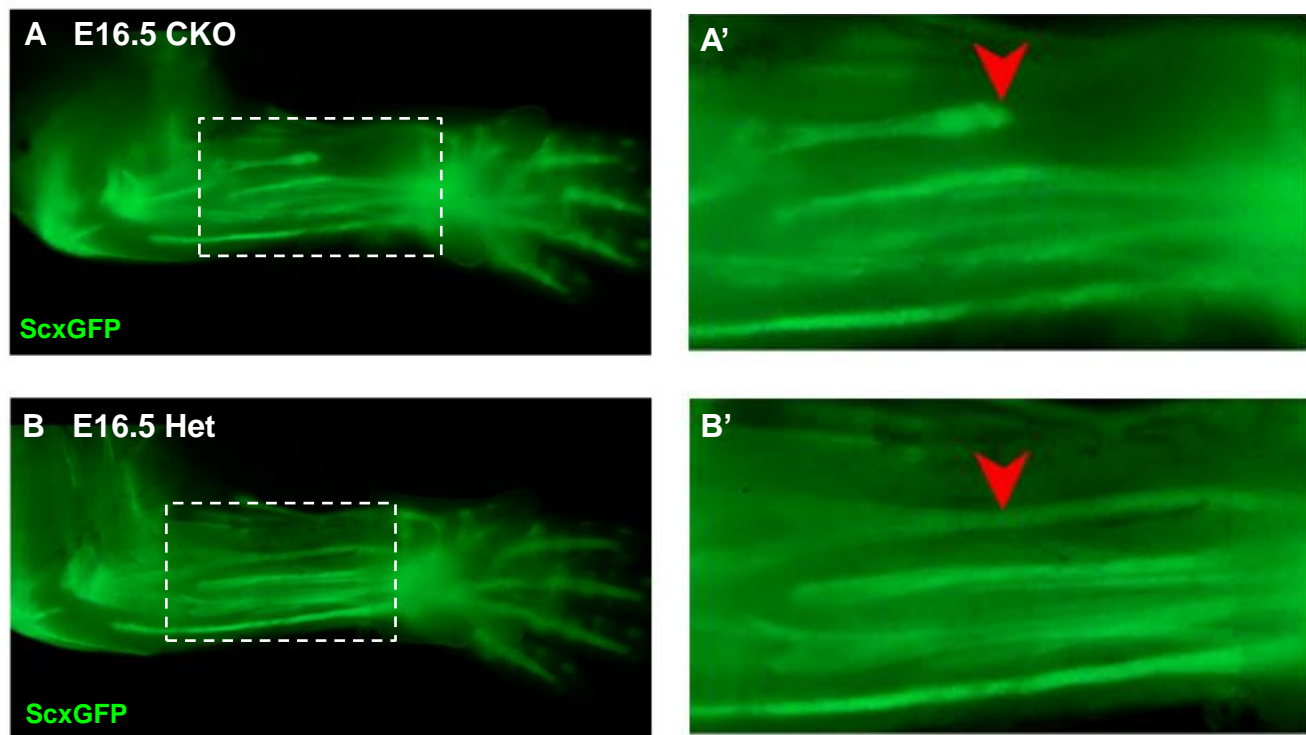

Supplement: supp [file elife_poa_e52695_Figure_1_figure_supplement_4.pdf › elife_poa_e52695_Figure_1_figure_supplement_4.pdf]

Figure 5-figure supplement 1

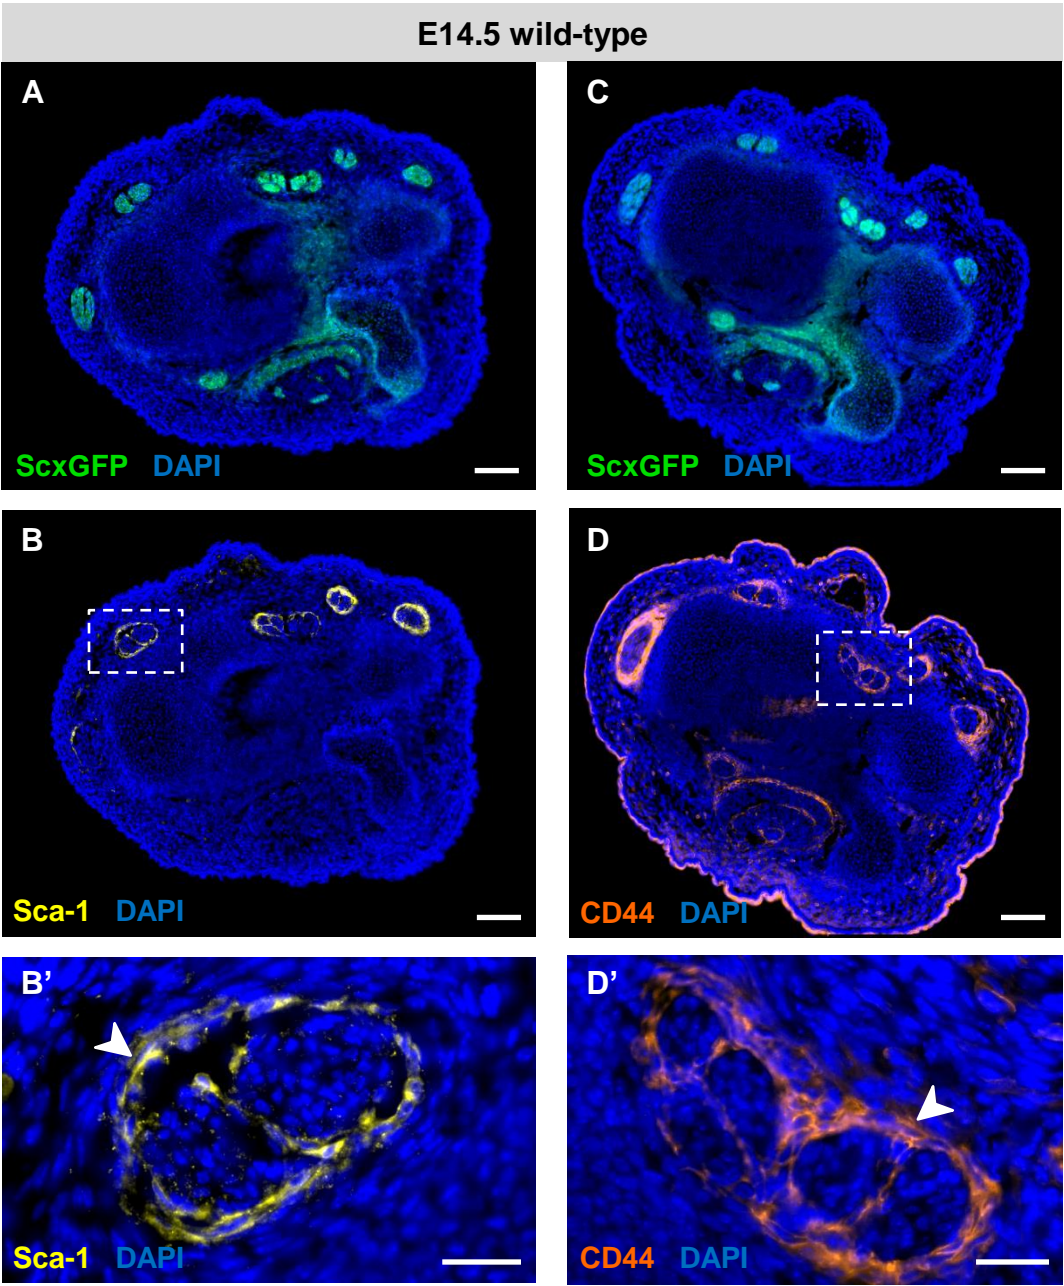

Supplement: supp [file elife_poa_e52695_Figure_5_figure_supplement_1.pdf › elife_poa_e52695_Figure_5_figure_supplement_1.pdf]

Figure 7-figure supplement 1

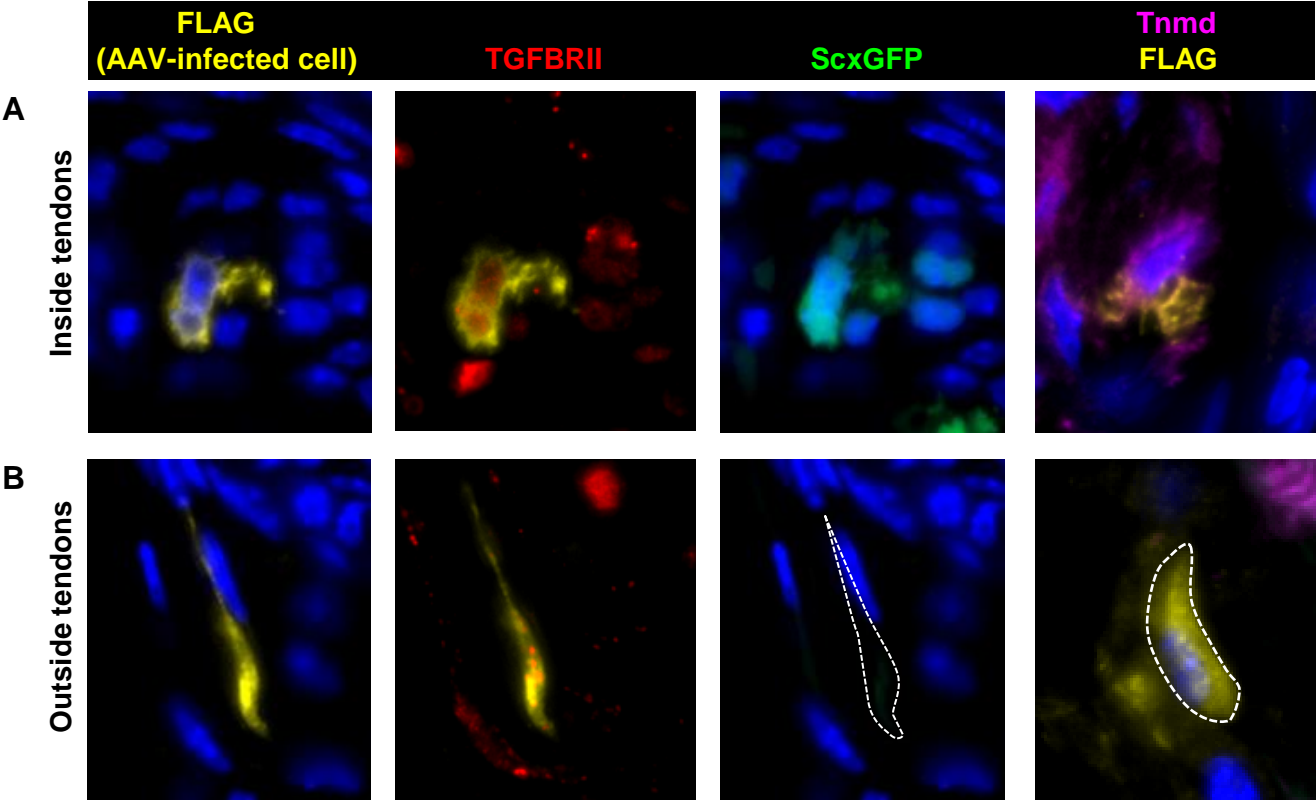

Supplement: supp [file elife_poa_e52695_Figure_7_figure_supplement_1.pdf › elife_poa_e52695_Figure_7_figure_supplement_1.pdf]
